# Supplementary material
Source: publisher site journal article supplement (https://www.dovepress.com/get_supplementary_file.php?f=259727.docx)
Supplement: Supplementary file 1 [file get_supplementary_file.php]

Appendix 1: Example assignment sheet

SPM Patient-Centered Potluck Competition

Friday, December 12

11:00- NOON

LRB

**PKU**

**Phenylketonuria**

This PBL group is responsible for creating a Hors d’oeuvre sized food dish for 30 people with PKU.

There are 3 other PBL groups with this same task with whom you will compete.

On Friday, at 11:00 we will have judges who will assess safety and taste.

The judging panel will be composed of class peers, faculty and guests with PKU.

During the judging, a member of your team will have 1-3 minutes to explain the ingredients and why they should vote for your tasty treat.

Please attach the recipe and ingredients.

Prizes will be awarded to the winners of each of five diet-managed disease categories

Grand Prize awarded to the Best of All Categories
